# Supplementary material for: A zinc–porphyrin–peptide conjugate via “click-chemistry”: synthesis and amyloid-β interaction
Source: Royal Society of Chemistry journal article supplement (doi:10.1039/d4nj02162b), 2024-01-01
Supplement: d4nj02162b1.pdf [file d4nj02162b1.pdf]

## SUPPORTING INFORMATION

### A Zinc-porphyrin-peptide conjugate via “click-chemistry”: synthesis and amyloid- $\beta$ interaction.

Rita Tosto <sup>1</sup>, Stefania Zimbone <sup>1</sup>, Giuseppe Di Natale <sup>1</sup>, Maria Laura Giuffrida <sup>1</sup>,  
Tiziana Campagna <sup>1</sup>, Giuseppe Pappalardo <sup>1,\*</sup> and Giuseppina Sabatino <sup>1\*</sup>

<sup>1</sup> CNR Istituto di Cristallografia, Via Paolo Gaifami, 18 95126 Catania, Italy; rita.tosto@phd.unict.it (RT); stefania.zimbone@ic.cnr.it (SZ); marialaura.giuffrida@cnr.it, (MLG), giuseppe.dinatale@cnr.it (GDN); giuseppe.pappalardo@cnr.it (GP); giuseppina.sabatino@cnr.it (GS).

\*Correspondence: giuseppe.pappalardo@cnr.it (GP) and giuseppina.sabatino@cnr.it (GS).

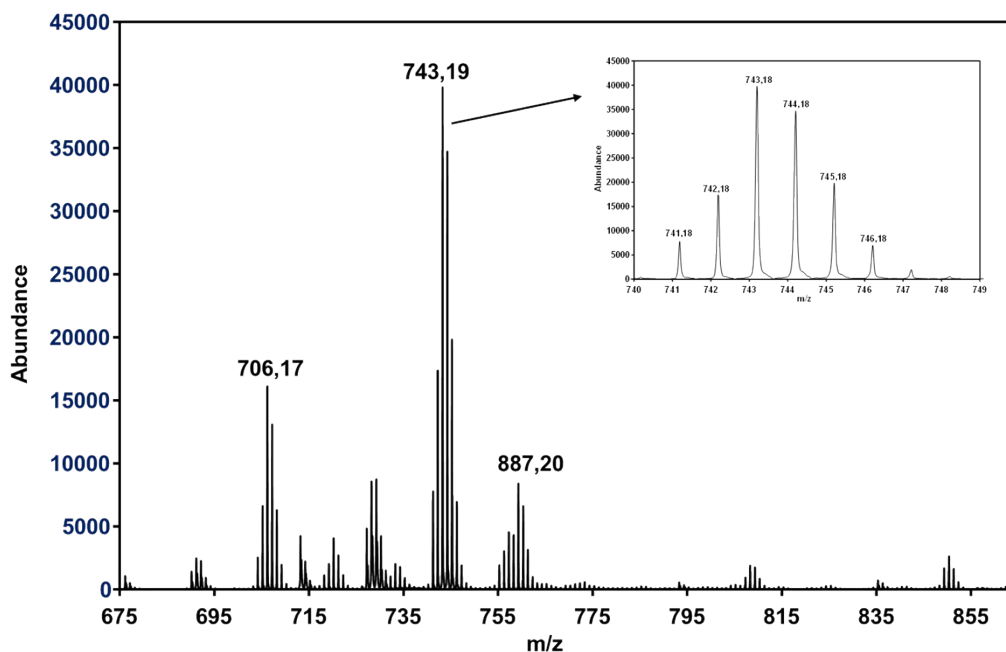

Figure S1. MALDI-MS of the mono-substituted N-(2-propynyl)benzamide porphyrin (2)

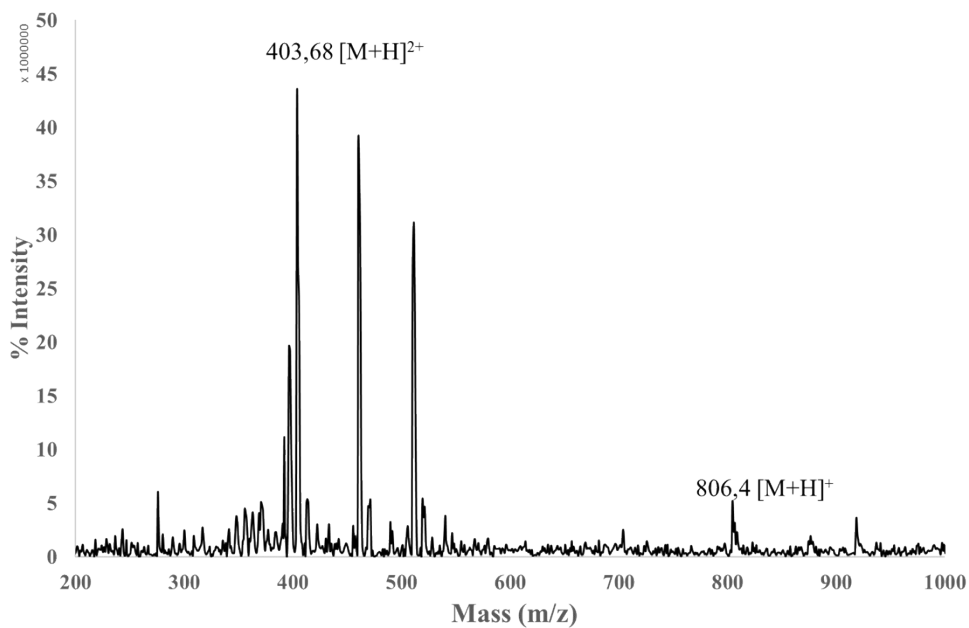

**Figure S2.** ESI-MS spectrum of the metallated porphyrin derivative **3**.

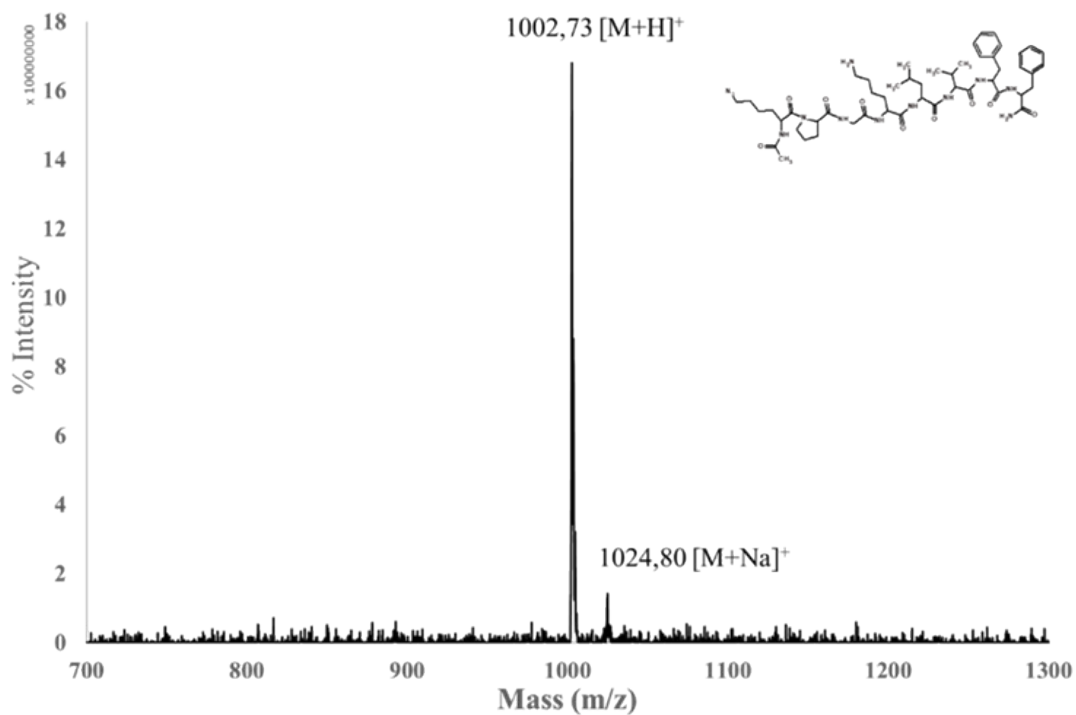

**Figure S3.** ESI-MS spectrum of the peptide Ac-K(N<sub>3</sub>)PGKLVFF (**4**)

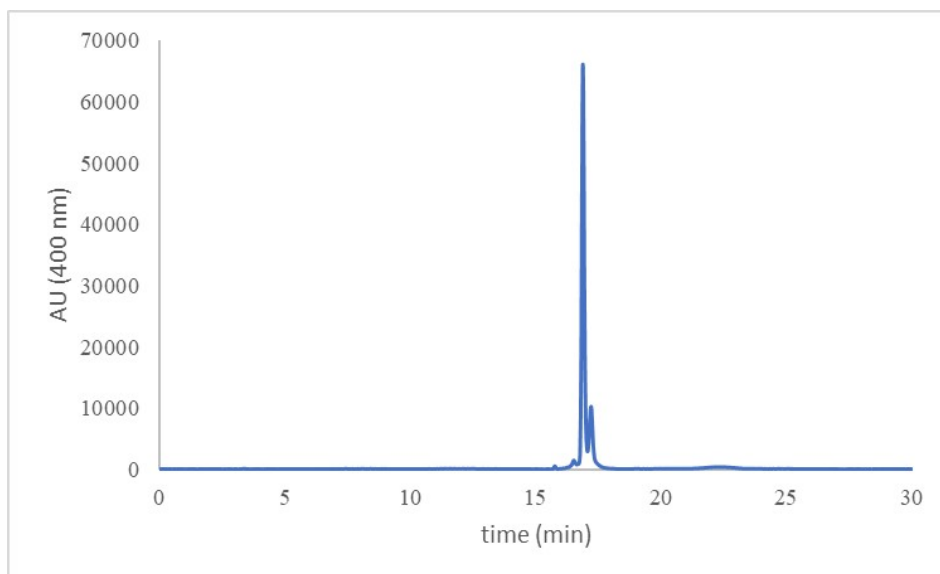

**Figure S4.** HPLC of the zinc-porphyrin-peptide conjugate **5**.

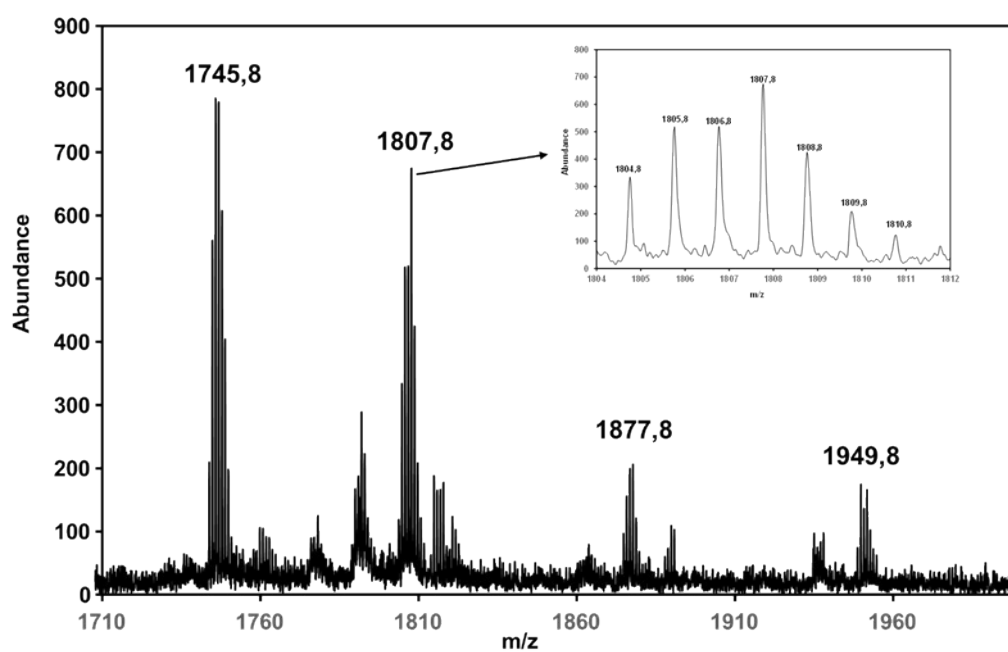

**Figure S5.** MALDI-MS of zinc-porphyrin-peptide conjugate **5**

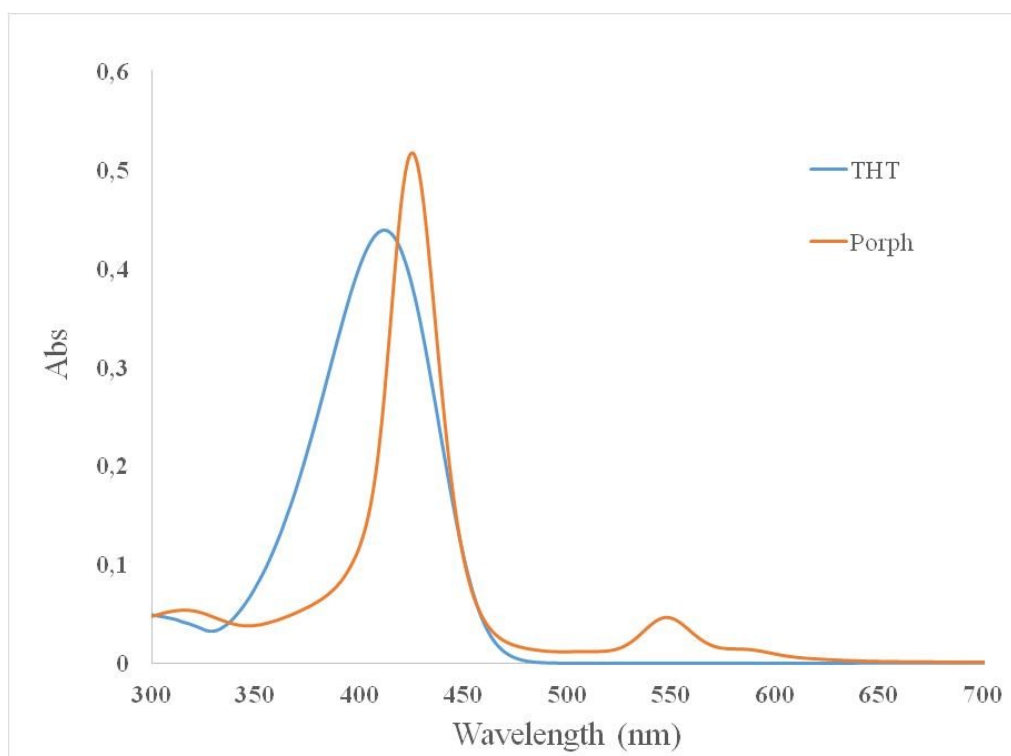

**Figure S6.** UV-visible absorption spectra of the porphyrin (1) and Thioflavin T (ThT)

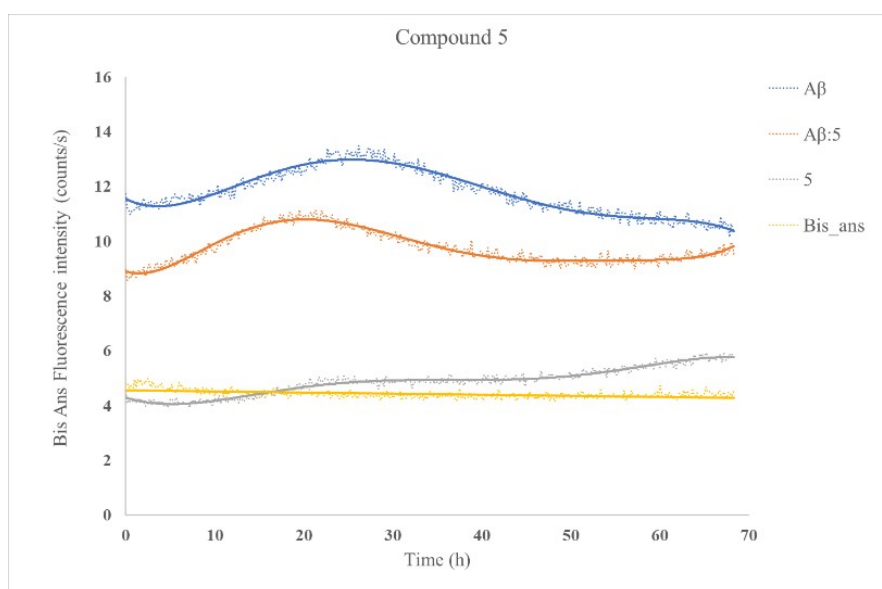

**Figure S7.** Bis-Ans kinetic aggregation curve of compound 5 either in the absence or in presence of A $\beta$  at 20 $\mu$ M and 1:1 molar ratio.

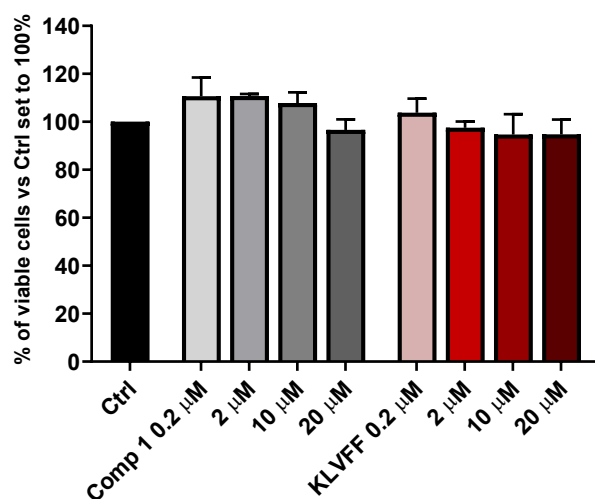

**Figure S8.** MTT Assay of fully differentiated SH-SY5Y treated for 48 hours with increasing concentrations of Comp 1 and KLVFF (0.2, 2, 10, 20  $\mu\text{M}$ ), separately added to evaluate the potential toxicity of the single components of the compound 5. Bars represent means  $\pm$ SEM of three independent experiments with  $n=3$  each

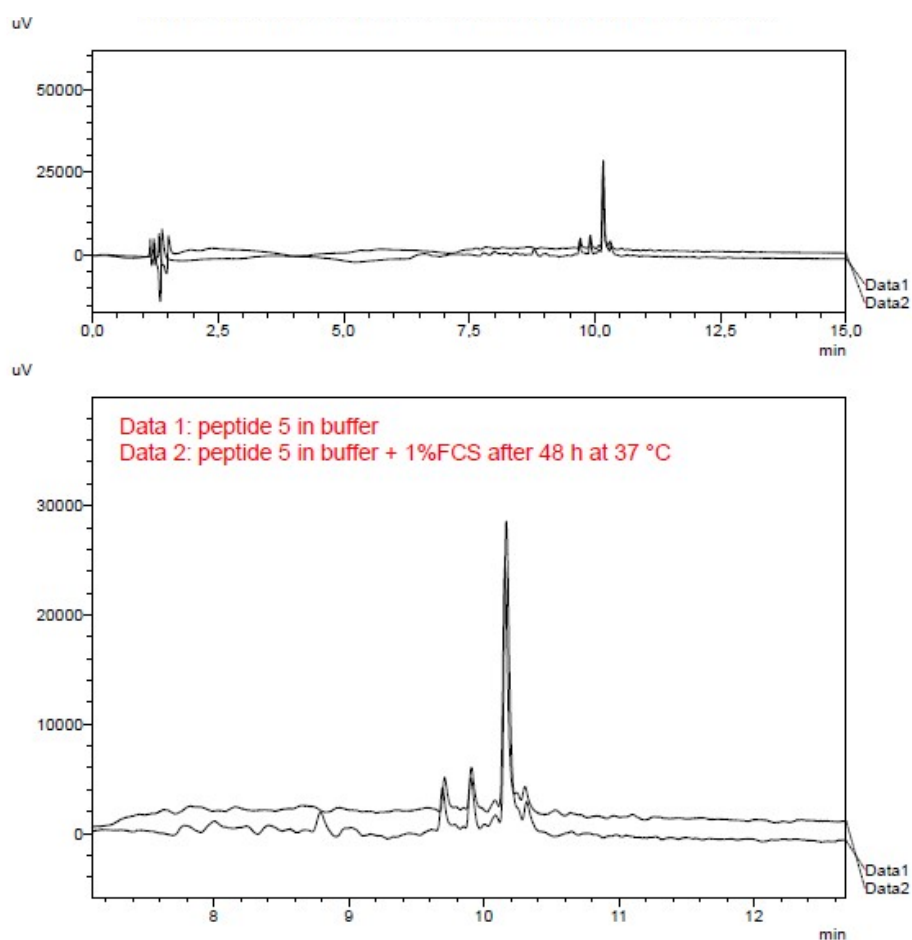

**Figure S9.** HPLC chromatogram of: (data 1) solution of the porphyrin 5 at 5 mM in 10 mM phosphate buffer at pH 7.4; (data 2) FCS-incubated peptide porphyrin at 5 mM after 48h at 37°C. Conditions: stationary phase Onyx Monolithic C18, (size 10  $\times$  4.6 mm); mobile phase A = 0.1% TFA in water/B = 0.1% TFA in ACN; flow rate 1.5 mL min<sup>-1</sup>; injection volume 10  $\mu\text{L}$ ; detection at 420 nm
